# Supplementary material for: Controlling the gate dielectric properties of vinyl-addition polynorbornene copolymersviathiol–ene click chemistry for organic field-effect transistors
Source: Royal Society of Chemistry journal article supplement (doi:10.1039/d1tc00283j), 2021-01-01
Supplement: d1tc00283j1.pdf [file d1tc00283j1.pdf]

## Electronic Supplementary Information for

# Controlling Gate Dielectric Properties of Vinyl-Addition Polynorbornene Copolymer via Thiol-Ene Click Chemistry for Organic Field-Effect Transistors

Myung-Jin Kim,<sup>‡a</sup> Hyunjin Park,<sup>‡a</sup> Jinha Ha,<sup>ab</sup> Linh Nguyet Thi Ho,<sup>ac</sup> Eun Chae Kim,<sup>ad</sup> Woohwa Lee,<sup>a</sup> Sungmin Park,<sup>a</sup> Jong Chan Won,<sup>ab</sup> Dong-Gyun Kim,<sup>\*ab</sup> Yun Ho Kim,<sup>\*ab</sup> and Yong Seok Kim<sup>\*ab</sup>

<sup>a</sup>Advanced Materials Division, Korea Research Institute of Chemical Technology (KRICT),  
Daejeon 34114, Republic of Korea

<sup>b</sup>Advanced Materials and Chemical Engineering, KRICT School, University of Science and  
Technology, 217 Gajeong-ro, Yuseong-gu, Daejeon 34114, Republic of Korea.

<sup>c</sup>Department of Applied Chemistry, Kumoh National Institute of Technology, 61 Daehak-ro,  
Gumi, Republic of Korea

<sup>d</sup>Department of Organic Materials Engineering, Chungnam National University, 99 Daehak-ro,  
Yuseong-gu, Daejeon, 34134, Republic of Korea

*\*Corresponding author: Dong-Gyun Kim (E-mail: dgkim@kRICT.re.kr)*

*Yun Ho Kim (E-mail: yunho@kRICT.re.kr)*

*Yong Seok Kim (E-mail: yongskim@kRICT.re.kr)*

<sup>‡</sup> These authors contributed equally to this work.

## Table of Contents

|                                                                                     |    |
|-------------------------------------------------------------------------------------|----|
| Experimental Section.....                                                           | 3  |
| Synthesis and Structural Characterization of P(NB/VNB) .....                        | 6  |
| Structural Characterization of Cross-Linked P(NB/VNB) (c-P(NB/VNB)) Thin Films..... | 8  |
| Surface Properties of c-P(NB/VNB) Thin Films.....                                   | 11 |
| Electrical Properties of c-P(NB/VNB) Thin Films.....                                | 12 |
| References for Electronic Supplementary Information.....                            | 17 |

## **Experimental Section**

**Materials.** Lithium tetrakis(pentafluorophenyl)borate ethyl etherate (LiFABA,  $\geq 97\%$ , AdipoGen), tris(dibenzylideneacetone)dipalladium(0) ( $\text{Pd}_2(\text{dba})_3$ , 97%, Sigma-Aldrich), Norbornene (NB, 98%, Sigma Aldrich), 5-vinyl-2-norbornene (VNB, 95%, Sigma-Aldrich), tricyclohexylphosphine ( $\text{PCy}_3$ , Sigma-Aldrich), pentaerythritol tetrakis(3-mercaptopropionate) (PETMP,  $>95\%$ , Sigma-Aldrich), bis(diethylamino)benzophenone (DEAB,  $\geq 99\%$ , Sigma-Aldrich), toluene (anhydrous, 99.8%, Sigma-Aldrich), were purchased and used as received. All other reagents and solvents were used as received from standard vendors.

**Copolymerization of NB and VNB.** The copolymerization was performed under a nitrogen atmosphere. First, the activated catalyst solution was prepared by addition of toluene (10 mL) to  $\text{Pd}_2(\text{dba})_3$  0.045 g (0.0491 mmol),  $\text{PCy}_3$  0.055 g (0.196 mmol), LiFABA 0.172 g (0.197 mmol) in 20 mL vials with magnetic stirring bar, and then stirred at room temperature for 1 h. Subsequently, the filtered solution activated catalyst (9.5 mL) was injected into the toluene solution containing NB 0.879 g (9.34 mmol) and VNB 1.12 g (9.32 mmol). The polymerization was carried out at room temperature for 12 hours. After 12 hours, the vial was moved outside the glove box, and the polymer solution was precipitated in an excess of acidified methanol and filtered. The filtered polymer was dissolved in toluene, and then activated charcoal was added into polymer solution. After stirring for 12 hours, this solution was filtered through aluminum powder, and then precipitated in acetone. Finally, the resulting copolymer was dried in a vacuum oven at 60 °C for 12 hours, yielding a white solid (1.82 g, 90.8%).  $^1\text{H}$  NMR (400 MHz,  $\text{CDCl}_3$ ,  $\delta/\text{ppm}$ , tetramethylsilane (TMS)) (Fig. S2): 5.90-5.74 (br,  $-\text{CH}=\text{C}-$ ), 5.27-4.87 (br,  $-\text{C}=\text{CH}_2$ ), 2.46–1.05 (br, NB). GPC-RI analysis: number-average molecular weight ( $M_n$ ) = 53.6 kDa, molecular weight dispersity ( $D$ ) = 3.04.



**Preparation of the cross-linked P(NB/VNB) polymeric film.** The cross-linked P(NB/VNB) films are named as cP(NB/VNB)-#, where # indicates the weight percent of PETMP to P(NB/VNB), and varied as 1, 3, 6, 12 wt % to find the optimized dielectric and surface properties of cP(NB/VNB)s. DEAB was used as a photoinitiator at 1 wt % to the P(NB/VNB). To fabricate cP(NB/VNB) films, appropriate amounts of P(NB/VNB), PETMP, and DEAB were dissolved in toluene, leading to the 4-5 wt% solution. The mixture was spin-coated at 2000 rpm for 60s onto the substrate, which was then annealed at 90 °C for 1 min. Subsequently, the coated samples were irradiated with ultraviolet (UV,  $\lambda = 365$  nm, 16 W lamp) at room temperature in an air environment to activate the cross-linking reaction between thiol group and C=C bond. The resultant films were put on a hot-plate and annealed at 90 °C for 20 min. The pristine P(NB/VNB) film without PETMP and DEAB was also prepared for the comparative experiment. To fabricate a photo-patterned cP(NB/VNB) film, 25  $\mu$ m-line patterned shadow mask was employed during UV exposure processing. After thermal treatment at 90 °C for 20 min, the cP(NB/VNB) film was immersed in toluene solvent for 5 min to develop the patterns and dried under N<sub>2</sub> flow.

**Instrumentation and Characterization.** <sup>1</sup>H NMR spectra were recorded on a Bruker Ascend 400 MHz in CDCl<sub>3</sub> solution. The FT-IR spectra were recorded on a Bruker VERTEX 80v FT-IR spectrometer. The number-average molecular weight ( $M_n$ ), weight-average molecular weight ( $M_w$ ), and polydispersity index ( $D$ ) of P(NB/VNB) were measured using gel permeation chromatography (GPC) in THF using Waters 515 Isocratic HPLC pump and Shodex columns (KF-800 series) at 40 °C. The signals were detected using a Waters 2414 refractive index detector. The molecular weights and polydispersity were calculated by a standard procedure relative to monodispersed polystyrene standards. The film thickness was measured with an alpha-step surface profiler ( $\alpha$ -step DC50, KLA-Tencor). The contact angles of DI water and diiodomethane were

measured using PHOENIX450 contact angle analyzer and the surface energy was calculated using the following equation:

$$(1 + \cos\theta)\gamma_{pl} = 2(\gamma_s^d\gamma_{pl}^d)^{0.5} + 2(\gamma_s^p\gamma_{pl}^p)^{0.5}$$

, where  $\gamma_{pl}$  is the surface energy of the test liquid and the  $d$  and  $p$  superscripts represent the dispersive and polar components, respectively. Atomic force microscopy (AFM) images were recorded with a tapping mode microscope (Nanoscope IV, Digital Instrument). The capacitance and DF of MIM capacitors were measured using Agilent E4980A. The electrical characteristics were measured using Keithley 4200A-SCS under the ambient conditions inside a dark box. toluene solvent for 5 min to develop the patterns and dried under N<sub>2</sub> flow.

**Device fabrication.** An OFET in bottom-gate top-contact structure was fabricated on a glass substrate (Eagle XG, Corning). A gate electrode was formed by depositing 30-nm thick aluminum using thermal evaporator. For gate dielectric layers, COC solutions with various content ratios of PETMP were deposited by spin-coating (2000 rpm for 60 s) on the substrate. In order to crosslinking reaction, deposited COC thin films were treated thermal annealing on a hot plate (100 °C for 1 min) and UV irradiation ( $\lambda = 365$  nm) was conducted for 1 J·cm<sup>-2</sup>. Pentacene was deposited an evaporation rate of 0.3 Å·s<sup>-1</sup> using thermal evaporator with substrate temperature at 80 °C. Finally, a 40 nm-thick gold was deposited to form contact electrodes through a shadow mask, which channel width and length were 1000 μm and 50 μm, respectively, using thermal evaporator. Thermal evaporation was performed under base pressure below  $3 \times 10^{-6}$  Torr.

## Synthesis and Characterization of P(NB/VNB)

**Table S1.** Material properties of P(NB/VNB) using Pd<sub>2</sub>(dba)<sub>3</sub>/LiFABA /PCy<sub>3</sub><sup>a</sup>

| entry | [M1]/[M2]<br>in the feed <sup>b</sup> | $M_{n,obsd}$<br>(kDa) <sup>d</sup> | $M_{w,obsd}$<br>(kDa) <sup>d</sup> | $\bar{D}$ <sup>d</sup> | yield (%) <sup>e</sup> | Content of<br>M2 (mol%) <sup>f</sup> |
|-------|---------------------------------------|------------------------------------|------------------------------------|------------------------|------------------------|--------------------------------------|
| 1     | 5:5                                   | 25.9                               | 74.9                               | 2.88                   | 92.3                   | 47.9                                 |
| 2     | 5:5                                   | 32.2                               | 113.9                              | 3.54                   | 94.2                   | 42.6                                 |
| 3     | 5:5                                   | 53.6                               | 163.3                              | 3.04                   | 90.8                   | 51.6                                 |

<sup>a</sup>Conditions: 5 wt % of monomer in toluene; [Pd]<sub>0</sub> = 0.01 M; [LiFABA]/[PCy<sub>3</sub>]/[Pd] = 2/2/1.

<sup>b</sup>[M]<sub>0</sub>/[Pd]<sub>0</sub> = 200. <sup>c</sup>Determined by GPC using differential refractive index (RI) detector, calibrated with narrow distribution polystyrene standards (THF). <sup>e</sup>Insoluble powder. <sup>f</sup>Determined by <sup>1</sup>H NMR.

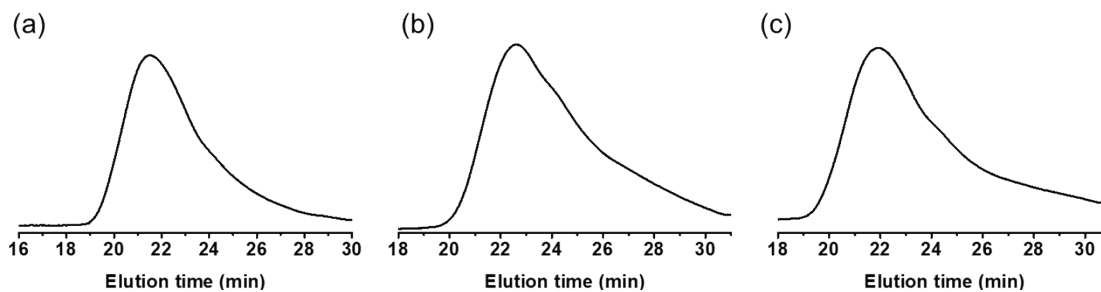

**Fig S1.** GPC-RI traces of P(NB/VNB): (a) entry 1 (Table S1), (b) entry 2 (Table S1), and (c) entry 3 (Table S1).

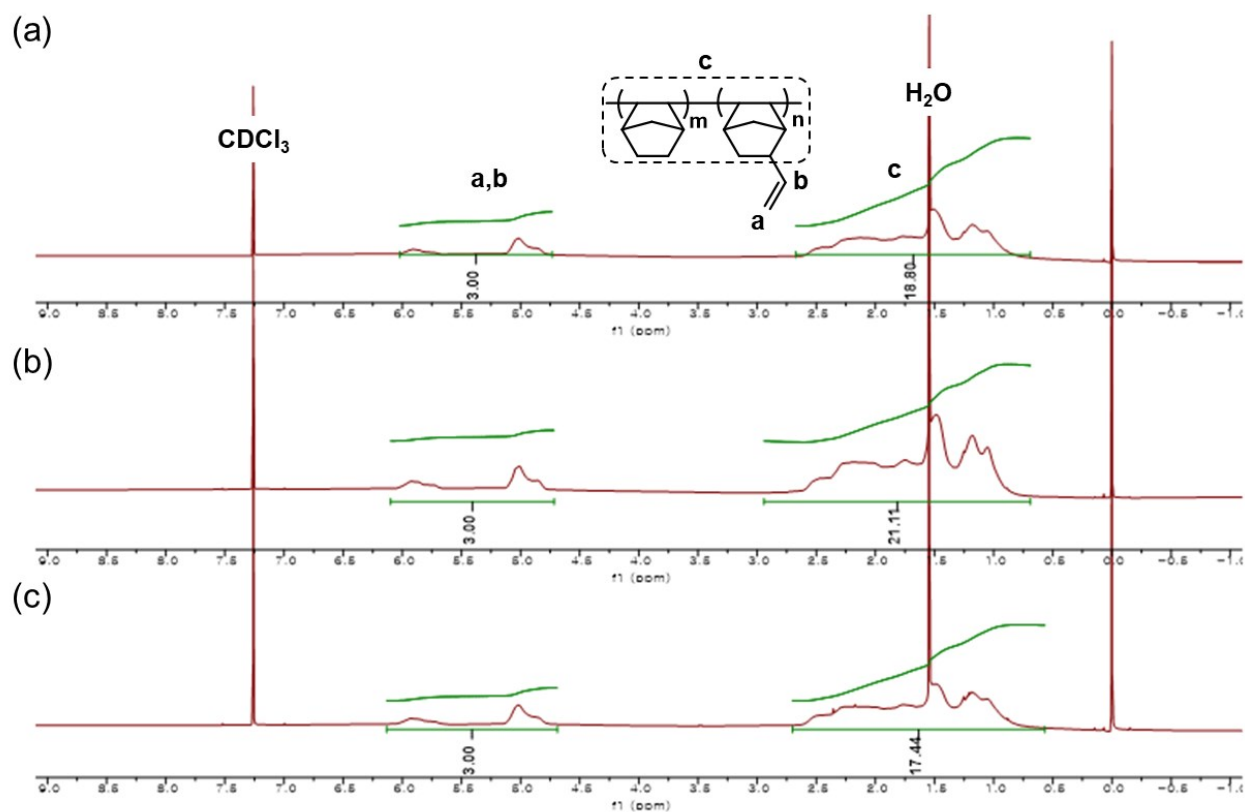

**Fig S2.**  $^1\text{H}$  NMR spectra of P(NB/VNB) (400 MHz,  $\text{CDCl}_3$ ) : (a) entry 1 in Table S1 (47.9 mol % VNB content), (b) entry 2 in Table S1 (42.6 mol % VNB content), and (c) entry 3 in Table S1 (51.6 mol % VNB content).

It is noted that the ratio of aliphatic to vinyl signals is 9:3 in poly(5-vinyl-2-norbornene) (PVNB).

Therefore, the VNB content ratio in the copolymers is calculated using the following equation:

$$\text{VNB content} = \frac{9}{\text{integration of aliphatic signal}} \times 100$$



## Structural Characterization of Cross-Linked P(NB/VNB) (c-P(NB/VNB)) Thin Films

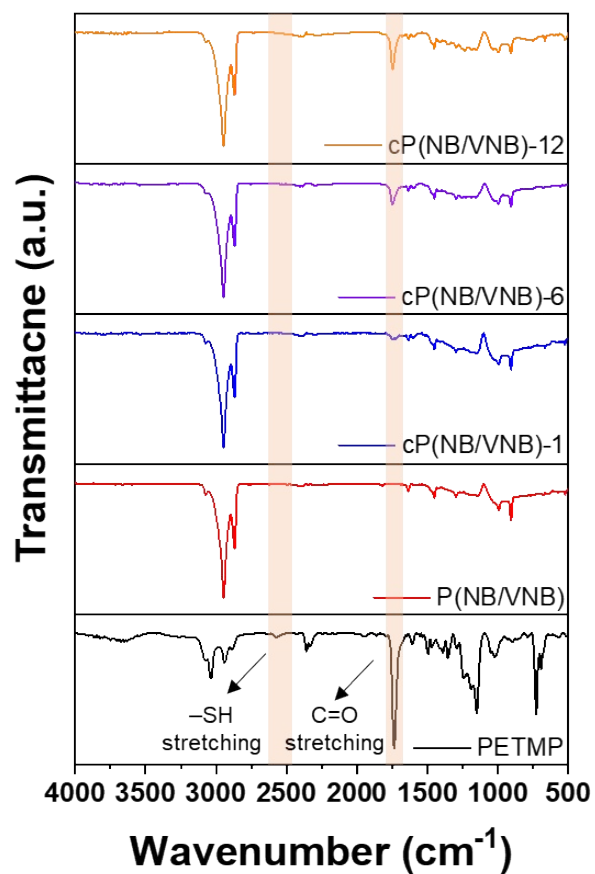

**Fig S3.** FT-IR spectra of PETMP, P(NB/VNB), cP(NB/VNB)-1, cP(NB/VNB)-6, and cP(NB/VNB)-12 thin films.

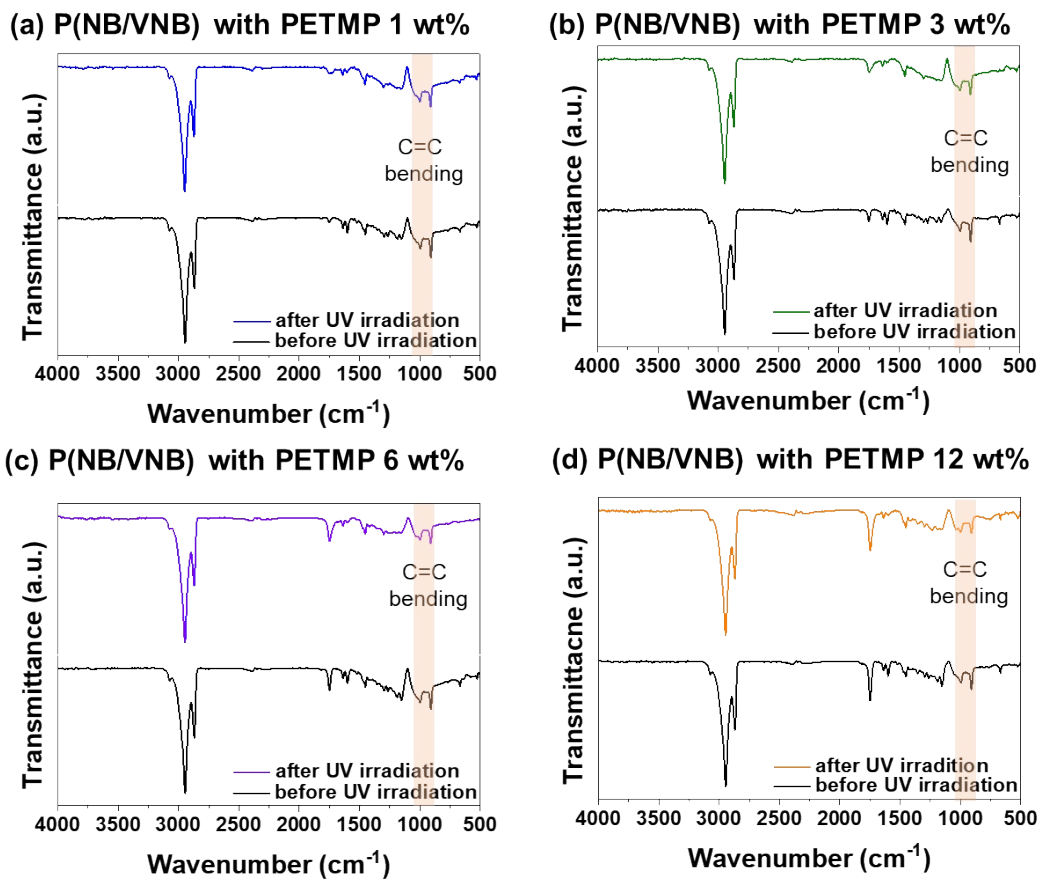

**Fig S4.** FT-IR spectra of before and after UV irradiation of vinyl-addition polynorborene copolymer thin films containing DEAB 1 wt%.

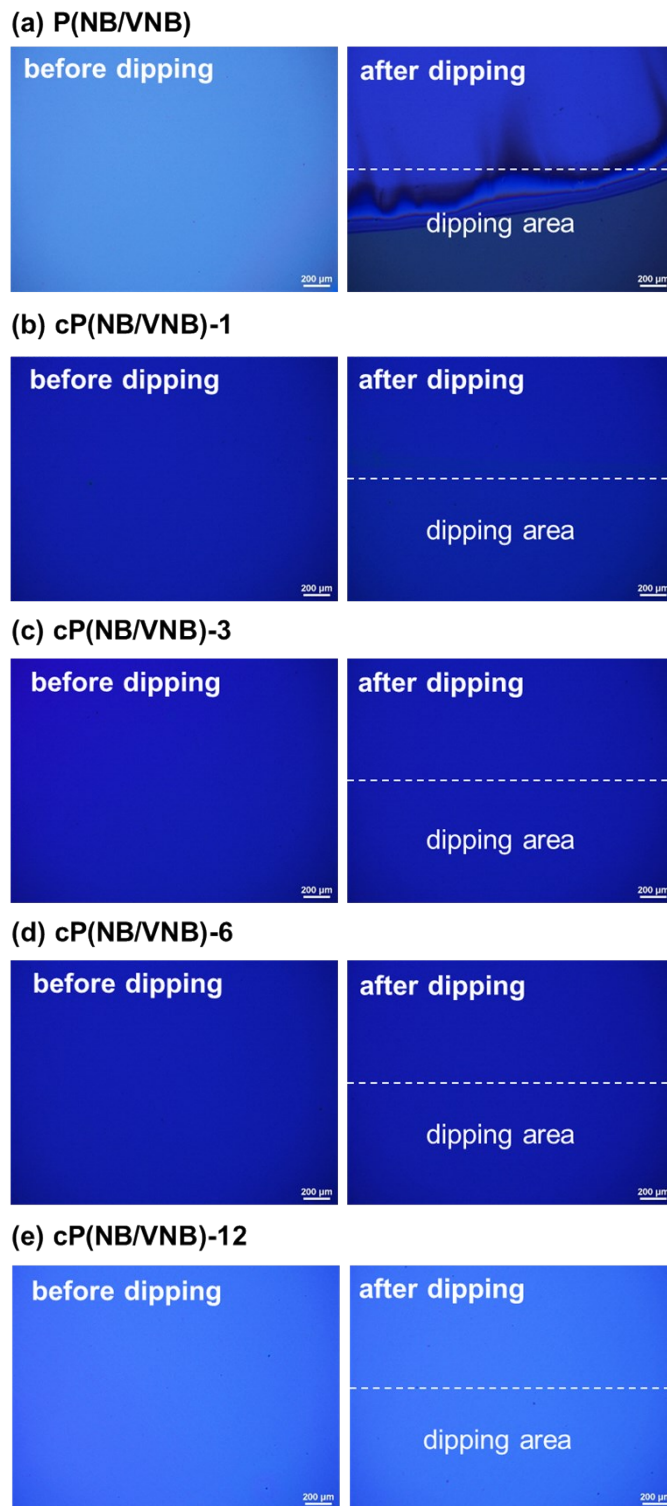

**Fig S5.** Optical microscope images of vinyl-addition polynorbornene copolymer thin films; before and after dipping in toluene for 5 min.

### Surface Properties of c-P(NB/VNB) Thin Films

**Table S2.** Surface properties of vinyl-addition polynorbornene copolymer gate dielectric thin films.

| Surface       | Contact angle (°) |               | Energy (mJ/m <sup>2</sup> ) |               |            |
|---------------|-------------------|---------------|-----------------------------|---------------|------------|
|               | Water             | Diiodomethane | $\gamma_{sp}$               | $\gamma_{sd}$ | $\gamma_s$ |
| P(NB/VNB)     | 77.67             | 29.07         | 3.89                        | 41.55         | 45.44      |
| P(NB/VNB)-1   | 74.41             | 28.87         | 5.20                        | 40.99         | 46.19      |
| cP(NB/VNB)-1  | 78.12             | 26.37         | 3.50                        | 42.80         | 46.29      |
| P(NB/VNB)-3   | 77.86             | 27.31         | 3.66                        | 42.35         | 46.02      |
| cP(NB/VNB)-3  | 76.84             | 26.86         | 4.02                        | 42.33         | 46.35      |
| P(NB/VNB)-6   | 75.35             | 22.20         | 4.24                        | 43.81         | 48.05      |
| cP(NB/VNB)-6  | 74.87             | 25.45         | 4.69                        | 42.50         | 47.19      |
| P(NB/VNB)-12  | 65.36             | 22.27         | 8.97                        | 41.81         | 50.78      |
| cP(NB/VNB)-12 | 70.11             | 26.35         | 6.94                        | 41.19         | 48.14      |

### **Electrical Properties of c-P(NB/VNB) Thin Films**

**Table S3.** Dielectric properties of MIM capacitors with vinyl-addition polynorbornene copolymer gate dielectrics.

|               | $t_d$<br>[nm] | $\epsilon_r$<br>@ 100Hz | DF<br>@ 1MHz | EBD<br>[MV·cm <sup>-1</sup> ] |
|---------------|---------------|-------------------------|--------------|-------------------------------|
| P(NB/VNB)     | 355           | 2.25                    | 0.003        | 2.54                          |
| cP(NB/VNB)-1  | 427           | 2.82                    | 0.036        | 2.46                          |
| cP(NB/VNB)-3  | 470           | 2.85                    | 0.041        | 3.10                          |
| cP(NB/VNB)-6  | 512           | 2.99                    | 0.047        | 3.21                          |
| cP(NB/VNB)-12 | 592           | 3.39                    | 0.075        | 3.27                          |

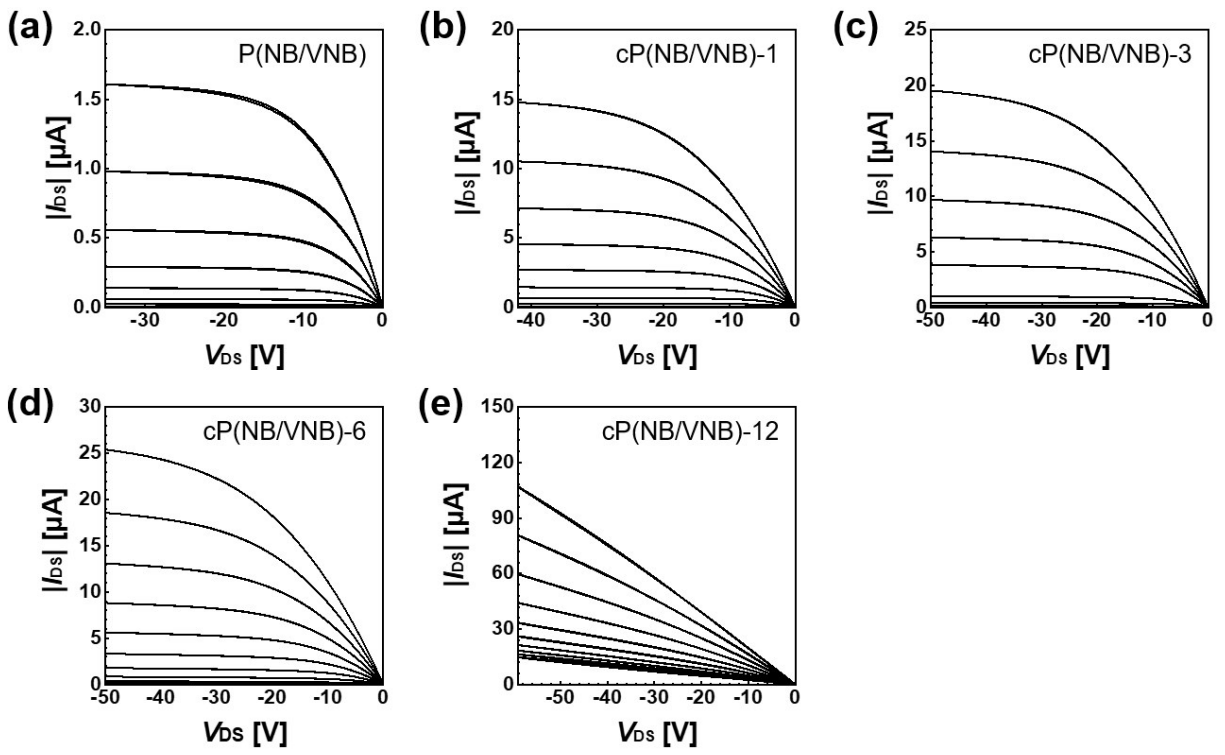

**Fig. S6** Typical output characteristics for pentacene-based OFETs with (a) P(NB/VNB), (b) cP(NB/VNB)-1, (c) cP(NB/VNB)-3, (d) cP(NB/VNB)-6, and (e) cP(NB/VNB)-12 gate dielectrics.

**Table S4.** Electrical characteristics of pentacene-based OFETs with vinyl-addition polynorbornene copolymer gate dielectrics.

|               | $\mu_{\text{FET}}$<br>[cm <sup>2</sup> ·V <sup>-1</sup> ·s <sup>-1</sup> ] | $V_{\text{th}}$<br>[V] | $E_{\text{th}}$<br>[MV·cm <sup>-1</sup> ] | $I_{\text{on}}/I_{\text{off}}$ |
|---------------|----------------------------------------------------------------------------|------------------------|-------------------------------------------|--------------------------------|
| P(NB/VNB)     | 0.11                                                                       | -20.4                  | -0.58                                     | $5.55 \times 10^4$             |
| cP(NB/VNB)-1  | 0.24                                                                       | -16.6                  | -0.40                                     | $1.06 \times 10^5$             |
| cP(NB/VNB)-3  | 0.23                                                                       | -19.2                  | -0.38                                     | $3.41 \times 10^5$             |
| cP(NB/VNB)-6  | 0.21                                                                       | -19.4                  | -0.38                                     | $3.89 \times 10^5$             |
| cP(NB/VNB)-12 | 0.10                                                                       | N.A.                   | N.A.                                      | $1.98 \times 10$               |

**Table S5.** Comparison of dielectric properties of polymer gate dielectrics

| Polymer gate dielectric | Ref.      | $d_t$ (nm) <sup>a</sup> | Dielectric constant ( $\epsilon_r$ ) | $J_{\text{leak}}$ (A cm <sup>-2</sup> ) <sup>b</sup>              | $E_{\text{bd}}$ [MV cm <sup>-1</sup> ] |
|-------------------------|-----------|-------------------------|--------------------------------------|-------------------------------------------------------------------|----------------------------------------|
| PS <sup>c</sup>         | S1        | 400                     | 2.8<br>(20 Hz)                       | 10 <sup>-7</sup><br>(1.5 MVcm <sup>-1</sup> )                     | –                                      |
|                         | S2        | 350                     | 2.36<br>(10 kHz)                     | 5 × 10 <sup>-5</sup><br>(2.0 MVcm <sup>-1</sup> )                 | –                                      |
|                         | S3        | 260                     | 2.9<br>(10 kHz)                      | 10 <sup>-6</sup><br>(bias voltage 20 V)                           | –                                      |
| PMMA <sup>d</sup>       | S1        | 410                     | 3.7<br>(20 Hz)                       | 10 <sup>-7</sup><br>(1.5 MVcm <sup>-1</sup> )                     | –                                      |
|                         | S3        | 180                     | 4.0<br>(10 kHz)                      | 10 <sup>-6</sup><br>(bias voltage 20 V)                           | –                                      |
| PVP <sup>e</sup>        | S4        | 200                     | 5<br>(100 Hz)                        | 10 <sup>-6</sup><br>(0.8 MVcm <sup>-1</sup> )                     | > 1                                    |
|                         | S5        | 350                     | 5.66<br>(1 MHz)                      | 10 <sup>-7</sup> ~ 10 <sup>-6</sup><br>(bias voltage 20 V)        | < 0.5                                  |
| PVA <sup>f</sup>        | S6        | 248                     | 6.3<br>(1 kHz)                       | 10 <sup>-9</sup><br>(1 MV/cm <sup>-1</sup> )                      | > 2                                    |
|                         | S7        | 537                     | 6.0<br>(100 kHz)                     | 10 <sup>-10</sup><br>(1 MV/cm <sup>-1</sup> )                     | > 1.9                                  |
| Polyimide               | S8        | 200                     | 3.2<br>(100 Hz)                      | 10 <sup>-8</sup><br>(2.0 MVcm <sup>-1</sup> )                     | < 2.5                                  |
|                         | S9        | 300                     | 3.3<br>(10 kHz)                      | 10 <sup>-10</sup><br>(2.0 MVcm <sup>-1</sup> )                    | > 3                                    |
| ENC <sup>g</sup>        | S2        | 350                     | 2.35                                 | 10 <sup>-7</sup><br>(2.0 MVcm <sup>-1</sup> )                     | –                                      |
|                         | S10       | 300                     | 2.27 ~ 2.34                          | 10 <sup>-10</sup> ~ 10 <sup>-7</sup><br>(2.0 MVcm <sup>-1</sup> ) | –                                      |
| P(NB/VNB)               | This work | 350 ~ 592               | 2.82 ~ 3.39                          | 10 <sup>-10</sup> ~ 10 <sup>-7</sup><br>(2.0 MVcm <sup>-1</sup> ) | > 2.46                                 |

<sup>a</sup> Thickness, <sup>b</sup> The leakage current density, <sup>c</sup> Polystyrene, <sup>d</sup> Poly(methyl methacrylate), <sup>e</sup> Poly(4-vinylphenol), <sup>f</sup> Polyvinyl alcohol, <sup>g</sup> Ethylene-norbornene copolymer



**Table S6.** Measurement conditions for OFETs based on pentacene with COC gate dielectrics.

|               | <b>Start <math>V_{GS}</math> [V]<br/>at 0.5 MV/cm</b> | <b>End <math>V_{GS}</math> [V]<br/>at -1.0 MV/cm</b> | <b>Voltage step<br/>[V]</b> |
|---------------|-------------------------------------------------------|------------------------------------------------------|-----------------------------|
| P(NB/VNB)     | 17.5                                                  | -35                                                  | 0.7                         |
| cP(NB/VNB)-1  | 21                                                    | -35                                                  | 0.84                        |
| cP(NB/VNB)-3  | 25                                                    | -35                                                  | 1                           |
| cP(NB/VNB)-6  | 25                                                    | -35                                                  | 1                           |
| cP(NB/VNB)-12 | 29.5                                                  | -35                                                  | 1.18                        |

## References for Electronic Supplementary Information

- S1 S. Li, L. Feng, J. Zhao, X. Guo, and Q. Zhang, *Polym. Chem.*, 2015, **6**, 5884–5890.
- S2 S. Nam, Y. J. Jeong and J. Jang, *Org. Electron.*, 2020, **85**, 105828.
- S3 S. Lia and Q. Zhang, *RSC Adv.*, 2015, **5**, 28980–28984.
- S4 S. C., M. P. Joshi and V. Singh, *Microelectron. Eng.*, 2018, **198**, 85–92.
- S5 K. Kim, N. Kwon and I. Chung, *Thin Solid Films*, 2014, **550**, 689–695.
- S6 W. Sun, J. Zhao, S. Chen, X. Guo and Q. Zhang, *Synth. Met.*, 2019, **250**, 73–78.
- S7 S. H. Jin, J. S. Yu, C. A. Lee, J. W. Kim, B. G. Park and J. D. Lee, *J. Korean Phys. Soc.*, 2004, **44**, 181–184.
- S8 H. Park, S. Yoo, M. H. Yi, Y. H. Kim and S. Jung, *Org. Electron.*, 2019, **68**, 70–75.
- S9 J. M. Won, H. J. Suk, D. Wee, Y. H. Kim, J. W. Ka, J. Kim, T. Ahn, M. H. Yi and K. S. Jang, *Org. Electron. physics, Mater. Appl.*, 2013, **14**, 1777–1786.
- S10 H. J. Kwon, X. Tang, S. Shin, J. Hong, W. Jeong, Y. Jo, T. K. An, J. Lee and S. H. Kim, *ACS Appl. Mater. Interfaces*, 2020, **12**, 30600–30615.
